# Supplementary material
Source: Springer Nature journal article supplement (https://www.springermedizin.de/resource/supplementary/12891_2001_14_MOESM1_ESM.pdf/9510336)

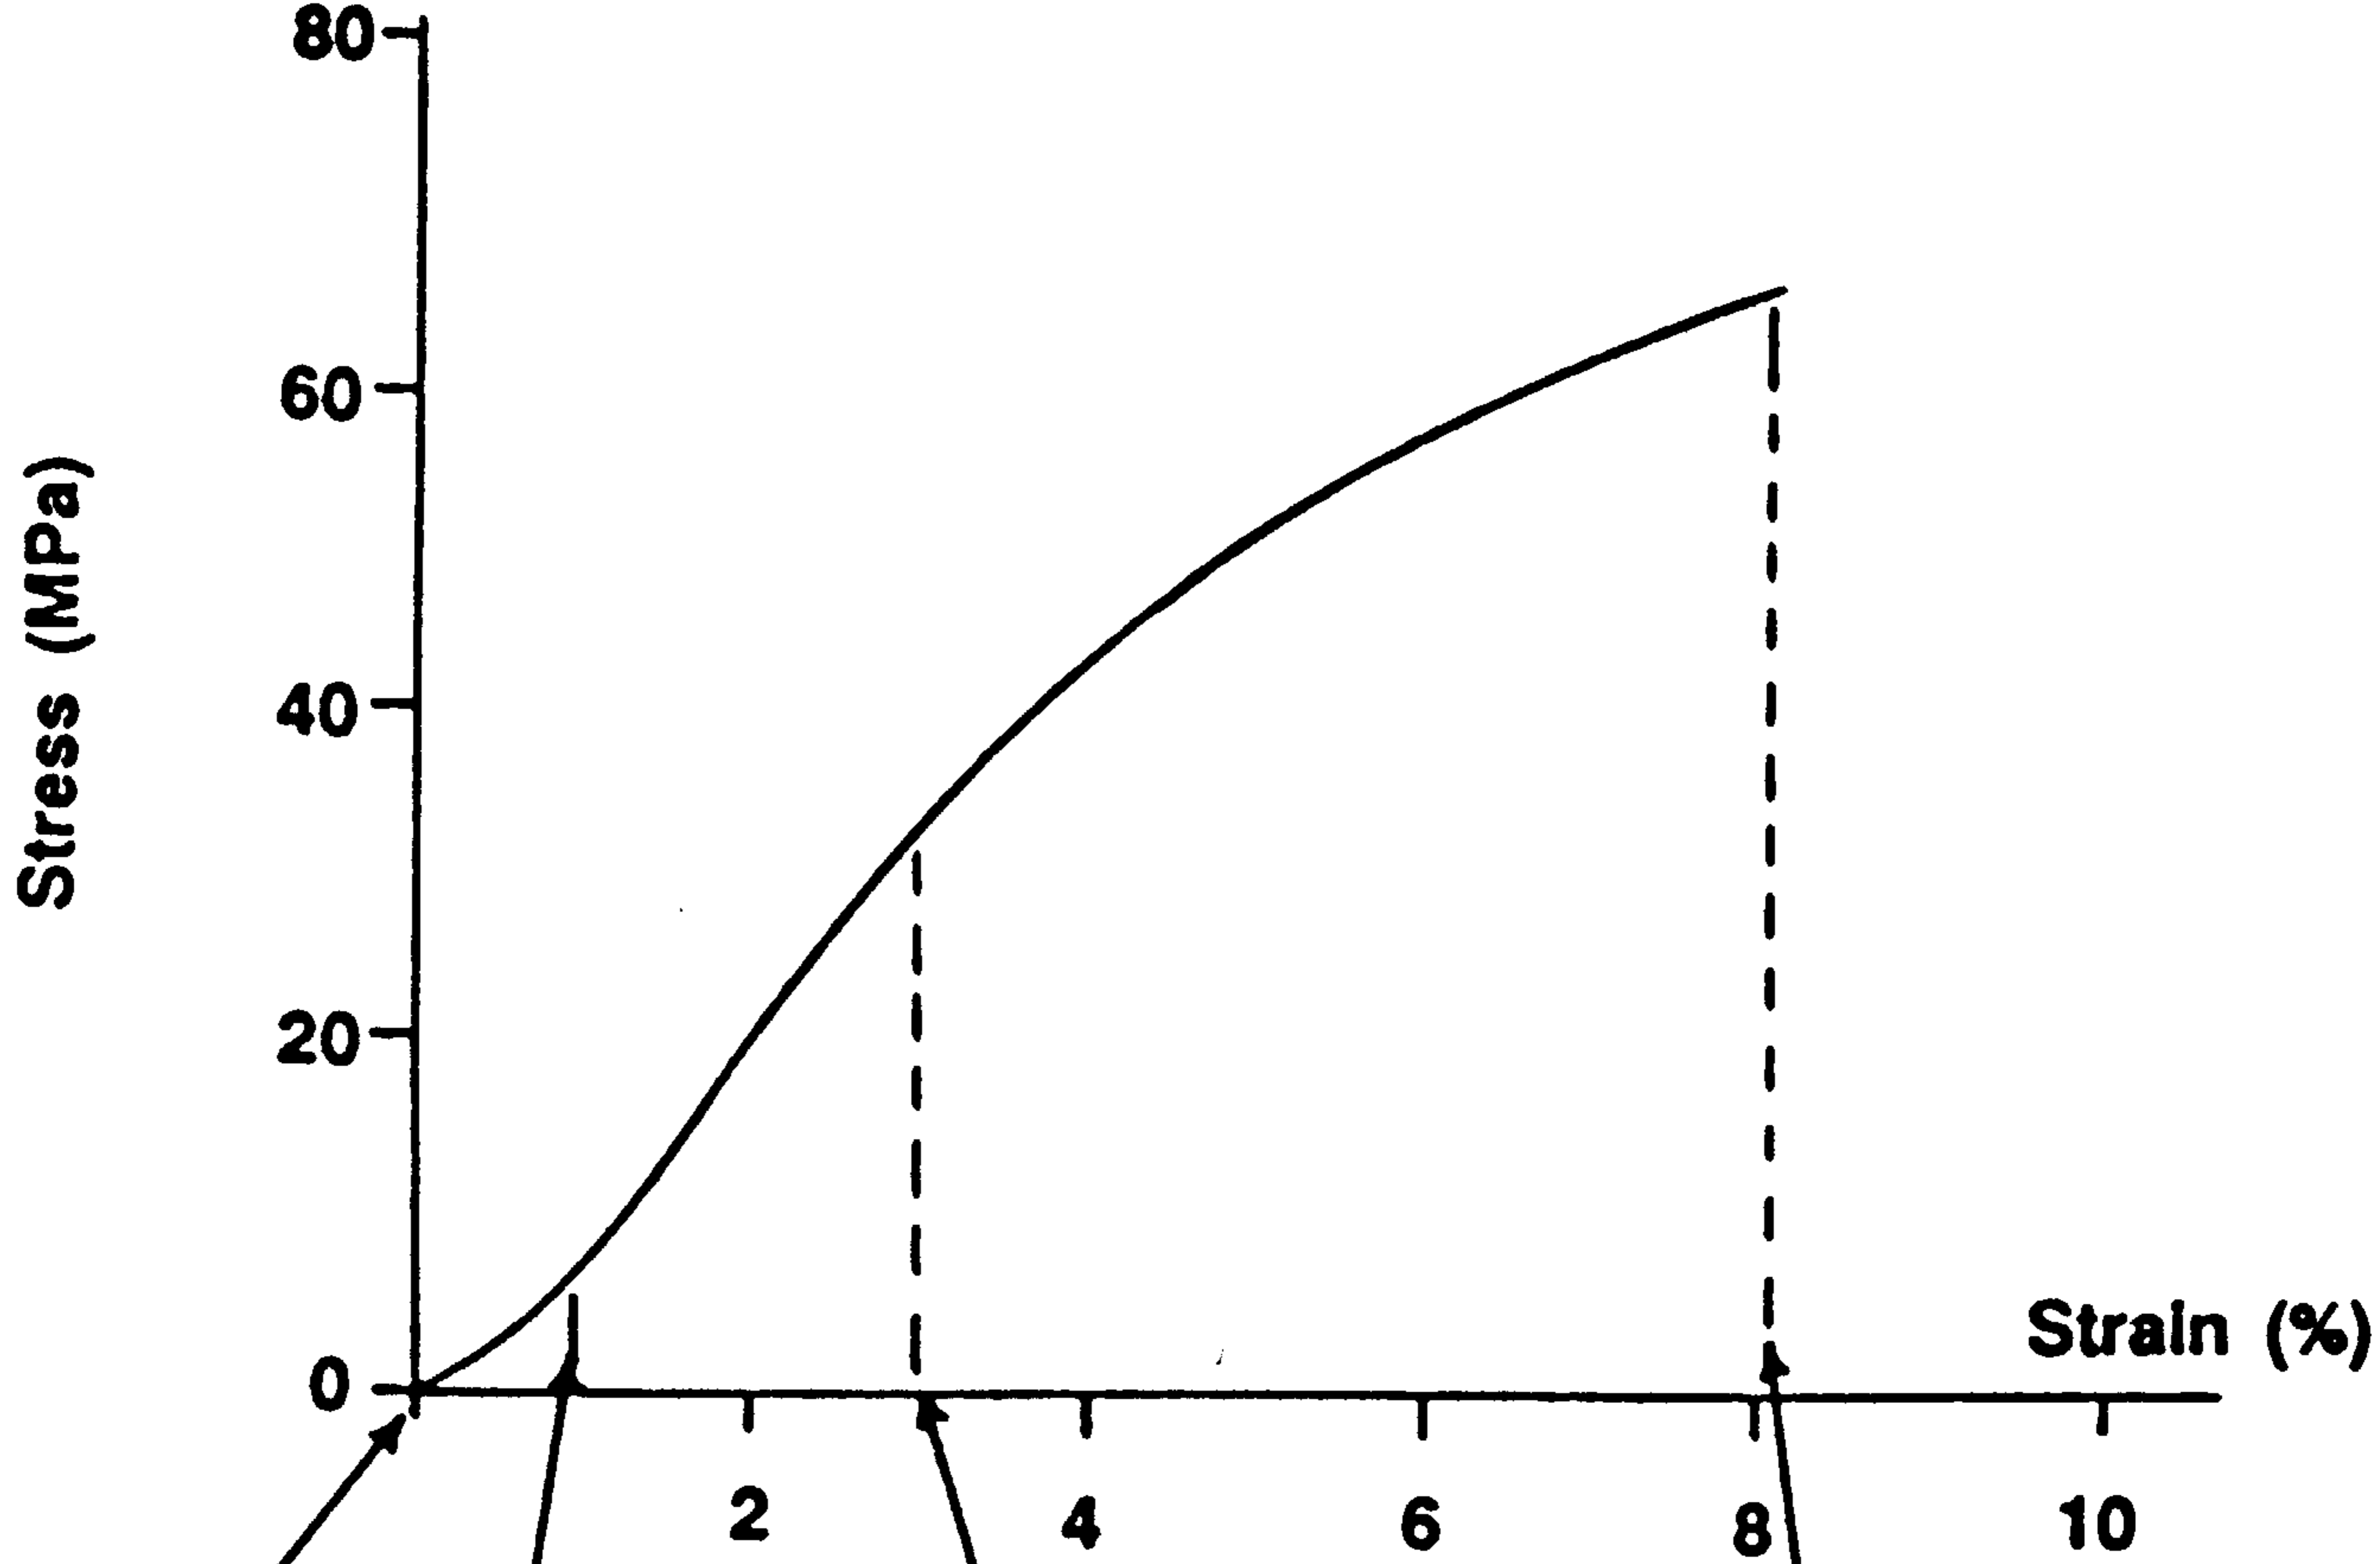

Toe

Linear

Failure

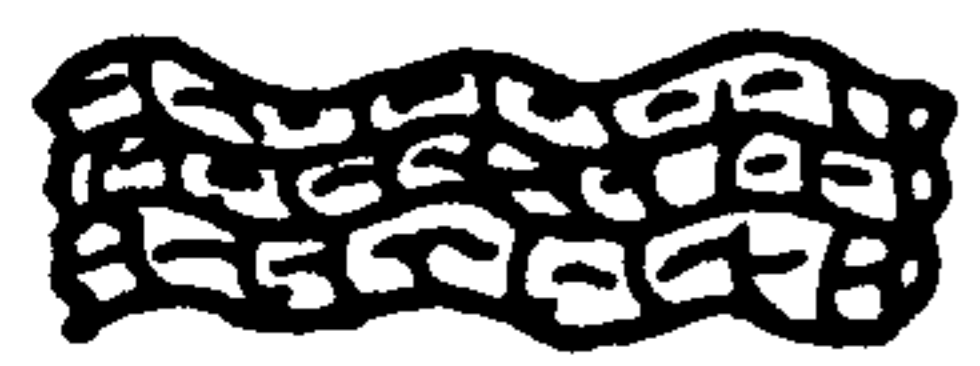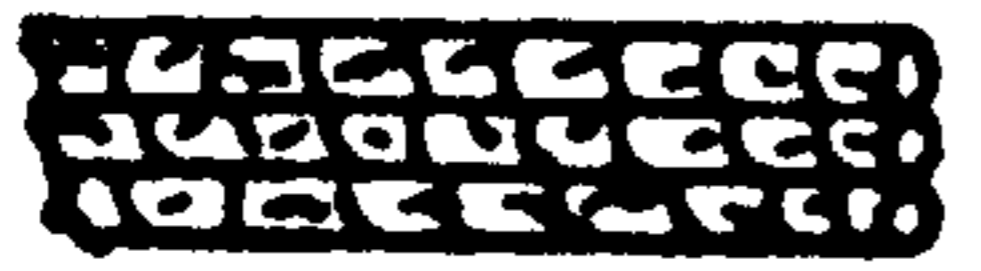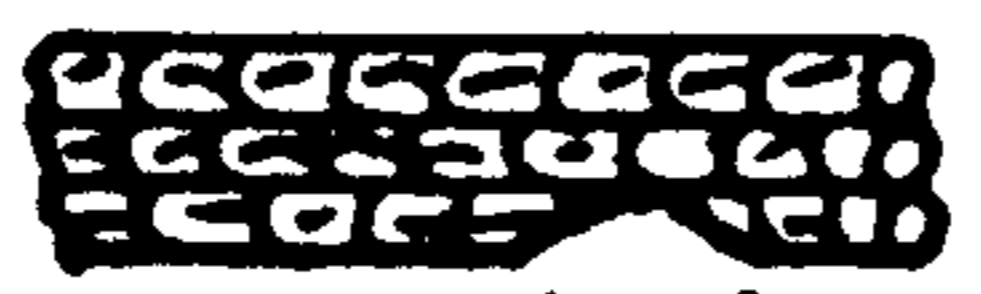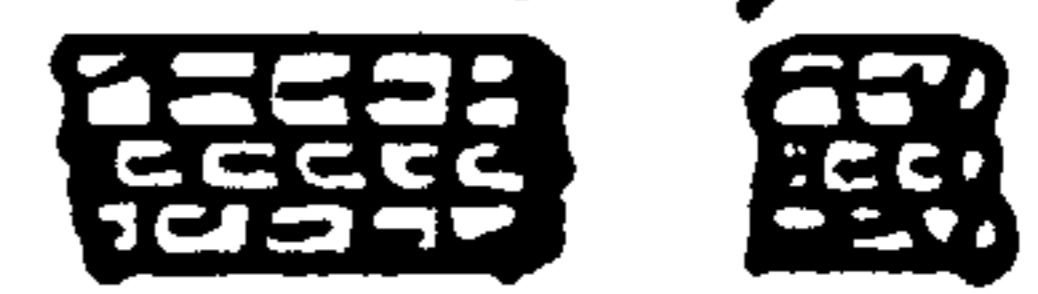

Supplement: MOESM1 [file 9510336]
